# Supplementary material for: Microfluidic investigation of pore-size dependency of barite nucleation
Source: PubMed Central journal article supplement (PMC10654916; doi:10.1038/s42004-023-01049-3), 2023-11-16
Supplement: 42004_2023_1049_MOESM1_ESM.pdf [file 42004_2023_1049_MOESM1_ESM.pdf]

## Supplementary Information

1  
2  
3  
4  
5  
6  
7  
8  
9  
10  
11  
12  
13  
14  
15  
16  
17  
18

### **MICROFLUIDIC INVESTIGATION OF PORE SIZE DEPENDENCY OF BARITE NUCLEATION**

Jenna Poonoosamy<sup>1</sup>, Abdulmonem Obaied<sup>1</sup>, Guido Deissmann<sup>1</sup>, Nikolaos I. Prasianakis<sup>2</sup>, Moritz Kindelmann<sup>3</sup>, Bastian Wollenhaupt<sup>4</sup>, Dirk Bosbach<sup>1</sup>, Enzo Curti<sup>2</sup>

1 Institute of Energy and Climate Research (IEK-6): Nuclear Waste Management, Forschungszentrum Jülich GmbH, 52425 Jülich, Germany

2 Laboratory for Waste Management, Paul Scherrer Institut, CH-5232 Villigen PSI, Switzerland

3 Ernst Ruska-Centre for Microscopy and Spectroscopy with Electrons (ER-C 2): Materials Science and Technology, Forschungszentrum Jülich GmbH, 52425 Jülich, Germany

4 Institute of Bio- and Geosciences (IBG-1): Biotechnology, Forschungszentrum Jülich GmbH, 52425 Jülich, Germany

Corresponding author: Jenna Poonoosamy

email: [j.poonoosamy@fz-juelich.de](mailto:j.poonoosamy@fz-juelich.de)

19 **Supplementary Note 1**

20 **Equation for pore size-controlled solubility (PCS)**

21 When a crystal grows from a solution in a pore of a porous material, its surface tension will give  
22 rise to excess pressure  $p$  within the crystal<sup>1</sup>. For cylindrical pores with radius  $r$  (**Fig. S1.1**) this  
23 excess pressure can be approximated by

24 
$$p = \frac{-2\gamma\cos\theta}{r} \quad (\text{S1.1})$$

25 where the factor of 2 results from the cylindrical pore geometry and  $\gamma$  is the surface tension  
26 [N m<sup>-1</sup>] and  $\theta$  is the contact angle between the pore wall, crystal, and liquid interface. The pressure  
27 increases for decreasing pore sizes.

28 The excess pressure  $p$  in a crystal can shift the solubility  $S$  of the solid from the bulk solubility  $S_0$   
29 and is given as<sup>2,3</sup>:

30 
$$p = (n^+ + n^-)RT \left[ \frac{1}{v_s^c} \ln \left( \frac{S}{S_0} \right) - \frac{Xv_w^l}{v_w^c} (S - S_0) \right] \quad (\text{S1.2})$$

31 where  $n^+$  and  $n^-$  are the numbers of positive and negative ions the solid dissociates into,  $R$  is the  
32 universal gas constant [J mol<sup>-1</sup> K<sup>-1</sup>],  $T$  is the temperature [K],  $v_w^c$  the molar volume of the solid  
33 phase (m<sup>3</sup> mol<sup>-1</sup>),  $v_w^l$  the molar volume of water in the liquid phase [L mol<sup>-1</sup>], and  $v_w^c$  the molar  
34 volume of the water in the solid [L mol<sup>-1</sup>]. The factor  $X$  (=1000) accounts for the conversion of  
35 mol L<sup>-1</sup> to mol m<sup>-3</sup>. The ratio of  $v_w^l$  and  $v_w^c$  accounts for the hydration of the solid phase. In the  
36 case of anhydrous crystals like barite the equation is written as:

37 
$$p = nRT \frac{1}{v_s^c} \ln \left( \frac{S}{S_0} \right) \quad (\text{S1.3})$$

38 The solubility of a salt inside the pores can be different from that in a bulk solution and increases  
39 when the stress on the crystal is compressive. Combining equations S1.1 and S1.2, the solubility  
40 can be written as a function of the pore radius<sup>4</sup>:

41 
$$\ln \frac{S}{S_0} = \frac{2\gamma v_s^c}{(n^+ + n^-)RT r} \quad (\text{S1.4})$$

42

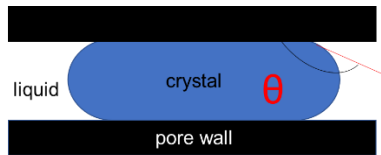

43

44 **Figure S1** Crystal growing in a cylindrical pore.

45 N.B.: In the case of barite, the solubility,  $S_0$ , is the square root of the solubility product constant  
46  $K_{sp}$  (cf. Supplementary Note 3).

47

48 **Supplementary Note 2**

49 **Temporal evolution of bulk experiment and associated Raman measurements**

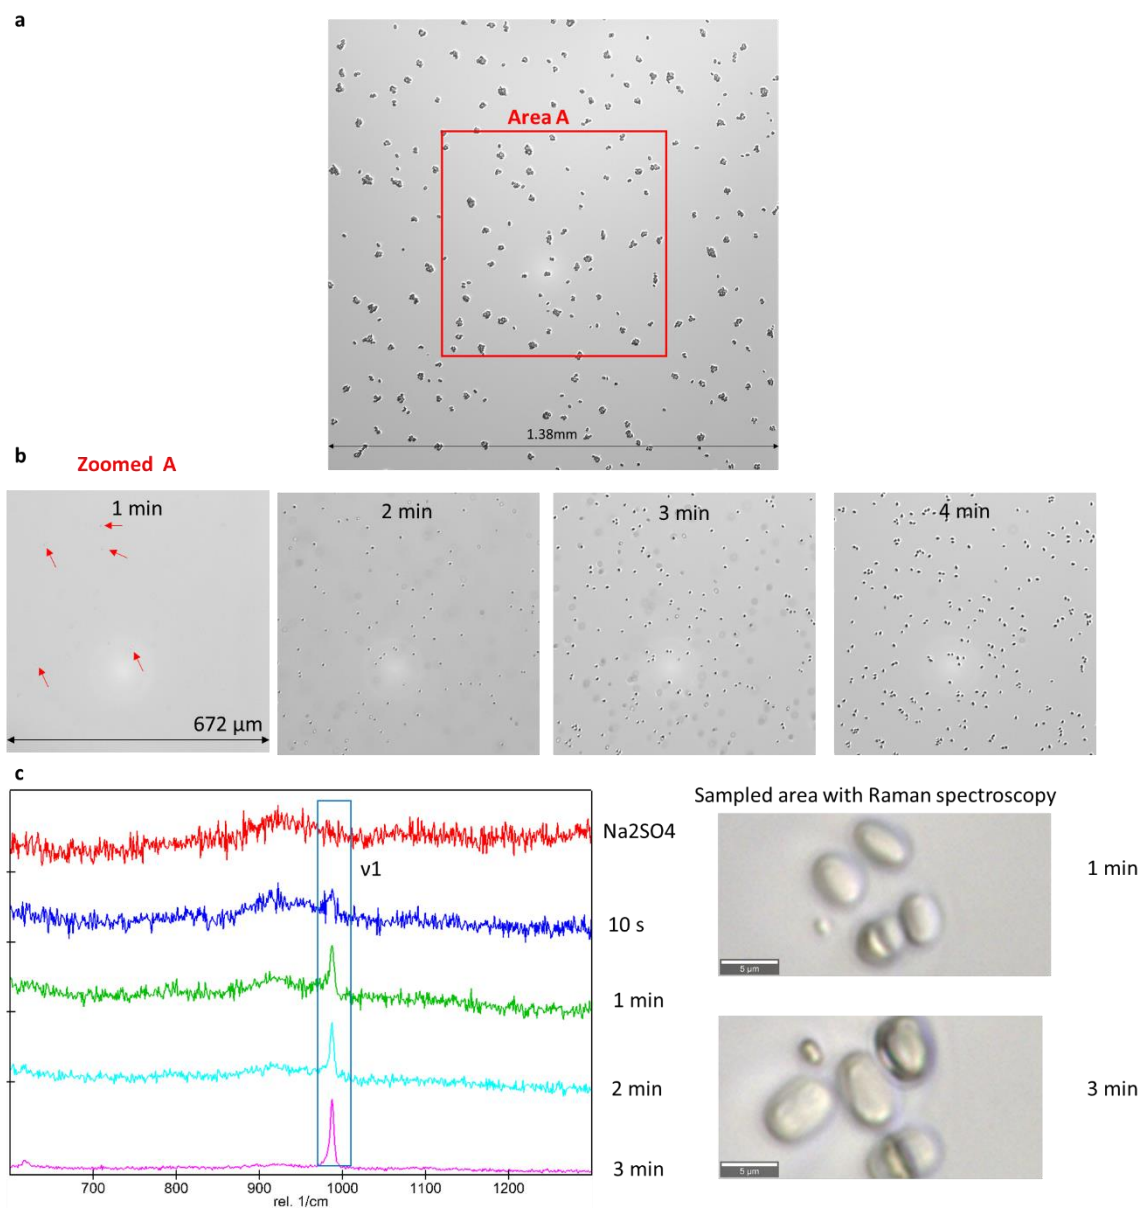

50  
51 **Figure S2 a** Micrograph of bulk solution in petri-dish after 15 minutes, with **b** a zoom in for the  
52 first 4 minutes (with red arrows indicating first visible crystallites), and **c** associated Raman  
53 spectra with a measuring time of 50 s (0.5 ms x100 integration and x100 objective).

54 These additional measurements are in agreement with the results reported in the main document  
55 with a much shorter measuring time of 5 s.

## 56 Supplementary Note 3

### 57 Calculation of nucleation rates of barite based on CNT

58 The nucleation rate depends on supersaturation and can be calculated as follows

$$59 \quad J = r \exp\left(-\frac{\Delta G_c}{kT}\right) \quad (\text{S3.1})$$

60 where  $k$  is the Boltzmann constant,  $T$  is the absolute temperature (298.15K),  $r$  a pre-exponential  
61 factor and  $\Delta G_c$  is the energy required for the formation of a nucleus of critical size.  $\Delta G_c$  is given  
62 as:

$$63 \quad \Delta G_c = \frac{\beta v_0^2 \sigma^3}{(kT \ln \Omega)^2} \quad (\text{S3.2})$$

64 where  $v_0$  is the molecular volume of the solid phase ( $8.6 \times 10^{-29} \text{ m}^3$  for barite),  $\beta$  is a geometry factor  
65 that depends on the shape of the nucleus and was set to 16.8 (value for spheres according to  
66 Nielsen<sup>5</sup>), and  $\sigma$  ( $\text{J m}^{-2}$ ) is the specific surface energy of the cluster/solution interface set to  $0.134$   
67  $\text{Jm}^{-2}$  for barite<sup>6</sup>.  $\Omega$  is the saturation ratio given as  $\Omega = \frac{\{Ba^{2+}\}\{SO_4^{2-}\}}{K_{sp}^0}$ , with the saturation index  $SI$   
68 defined as  $SI = \log_{10} \Omega$ .

69 The pre-exponential factor,  $r$ , includes a volume diffusion step and is given as:

$$70 \quad r = 2\pi Z D N_0 N_1 d_c \quad (\text{S3.3})$$

71 where  $D$  is the diffusion coefficient of  $\text{BaSO}_4$  monomers in free water<sup>7</sup> set to  $9.3 \times 10^{-10} \text{ m}^2 \text{ s}^{-1}$  and  
72  $d_c = \frac{4\sigma v}{kT \ln \Omega}$ .  $N_1$  and  $N_0$  are concentrations that represent the number of monomers per unit volume  
73 of fluid and the number of nucleation sites, respectively.

74 The values for  $N_0$  are usually fitted values. For the interpretation of our results, we used the values  
75 reported for barite in Prieto<sup>7</sup>, given in Table S3 as case 0.

76  $N_1$  depends on the solute concentrations in the aqueous solution and refers to the amount of  
77 aqueous  $\text{BaSO}_4$  molecules per  $\text{m}^3$ ; their concentration was determined from speciation calculations  
78 using GEMS<sup>8</sup>.

79  $Z$  is the Zeldovich factor given as:

$$80 \quad Z = \sqrt{\left(\frac{\Delta G_c}{3\pi kT (n_c)^2}\right)} \quad (\text{S3.4})$$

81 with the number of monomers in the critical nucleus,  $n_c$ , given as:

$$82 \quad n_c = \left(\frac{2\sigma a}{3kT \ln \Omega}\right)^3 \quad (\text{S3.5})$$

83 where  $a = 9.42 \times 10^{-19} \text{ m}^2$  is the area occupied by a molecule of  $\text{BaSO}_4$ <sup>7</sup>.

84 In the case of 3D nucleation,  $\sigma$  is replaced by an effective specific surface energy  $\sigma_{\text{eff}}$  ( $\text{J m}^{-2}$ ) given  
85 as:

86

$$\gamma_{ef} = \Psi^{\frac{1}{3}}(\theta)\gamma \quad (\text{S3.6})$$

87 where  $\Psi(\theta) = \left(\frac{1}{4}\right)(2 + \cos\theta)(1 - \cos\theta)^2$ .  $n_c$  and the pre-exponential factor,  $\delta$ , were re-evaluated  
88 accordingly.

89 We used the values for  $N_0$  as reported by Prieto<sup>7</sup> for calculating the nucleation rate for the section  
90 “Barite nucleation in confinement” i.e. (droplet experiment). In addition to values reported by  
91 Prieto<sup>7</sup>, we conducted a sensitivity analysis (case 1 and 2) to quantify the impact of  $N_0$  (HET) on  
92 the nucleation rate using different contact angles: 30° for hydrophilic surfaces, 80° for hydrophobic  
93 surfaces, and 72.9° as a fitted value to match our experimentally measured rates in the droplets.  
94 As reported in the following Table S3, the nucleation rate scales proportionally with the values of  
95 nucleation sites ( $N_0$ ). This follows directly from eq. S3.1 and S3.3. In contrast, the nucleation rate  
96 ( $J$ ) has an exponential dependence on the contact angle, implying that small changes in the contact  
97 angle change the nucleation rate ( $J$ ) by several orders of magnitude. These effects including (i)  
98 HOM proceeds at a much faster rate than HET (ii) the influence of  $N_0$  on the computed nucleation  
99 rate and (iii) the influence of  $\theta$  on the nucleation rate, are also captured by Figure S3 which depicts  
100 the nucleation rate as function of SI for various calculation cases presented in Table S3. Based on  
101 the data reported in Table S3, in our experiments heterogeneous nucleation is most likely involved;  
102 homogeneous nucleation can be excluded based on the vanishingly small, calculated values of  $J$   
103 compared to the experimentally observed rates.

104 **Table S1** Influence of  $N_0$  and contact angle ( $\theta$ ) on the nucleation rate calculated for an SI of 2.8  
105 using a fixed  $N_1$  of  $3.65 \times 10^{22} \text{ m}^{-3}$ . (N.B the highlighted row indicates the contact angle value fitted  
106 to the presented experimental data).

| Calculation case                 | $N_0$<br>[ $\text{m}^{-3}$ ] | $\theta$<br>[°] | $J$<br>[ $\text{m}^{-3}\text{s}^{-1}$ ] |
|----------------------------------|------------------------------|-----------------|-----------------------------------------|
| Homogeneous nucleation           |                              |                 |                                         |
| Case 0a ( $N_0$ based on Prieto) | $3.3 \cdot 10^{28}$          | n.a.            | $6.69 \times 10^{-14}$                  |
| Case 1a                          | $3.3 \cdot 10^{27}$          | n.a.            | $6.69 \times 10^{-15}$                  |
| Case 2a                          | $3.3 \cdot 10^{29}$          | n.a.            | $6.69 \times 10^{-13}$                  |
| Heterogeneous nucleation         |                              |                 |                                         |
| Case 0b ( $N_0$ based on Prieto) | $2.5 \cdot 10^{13}$          | 30              | $6.52 \times 10^{15}$                   |
| Case 1b                          | $2.5 \cdot 10^{12}$          | 30              | $6.52 \times 10^{14}$                   |
| Case 2b                          | $2.5 \cdot 10^{14}$          | 30              | $6.52 \times 10^{16}$                   |
| Case 0c ( $N_0$ based on Prieto) | $2.5 \cdot 10^{13}$          | 80              | $2.01 \times 10^4$                      |
| Case 1c                          | $2.5 \cdot 10^{12}$          | 80              | $2.01 \times 10^3$                      |
| Case 2c                          | $2.5 \cdot 10^{14}$          | 80              | $2.01 \times 10^5$                      |
| Case 0d ( $N_0$ based on Prieto) | $2.5 \cdot 10^{13}$          | 72.9            | $2.84 \times 10^0$                      |
| Case 1d                          | $2.5 \cdot 10^{12}$          | 72.9            | $2.84 \times 10^{-1}$                   |
| Case 2d                          | $2.5 \cdot 10^{14}$          | 72.9            | $2.84 \times 10^1$                      |
| Experimental results             | n.a.                         | n.a.            | $2.0 \times 10^4 - 2.0 \times 10^6$     |

107

108  
109

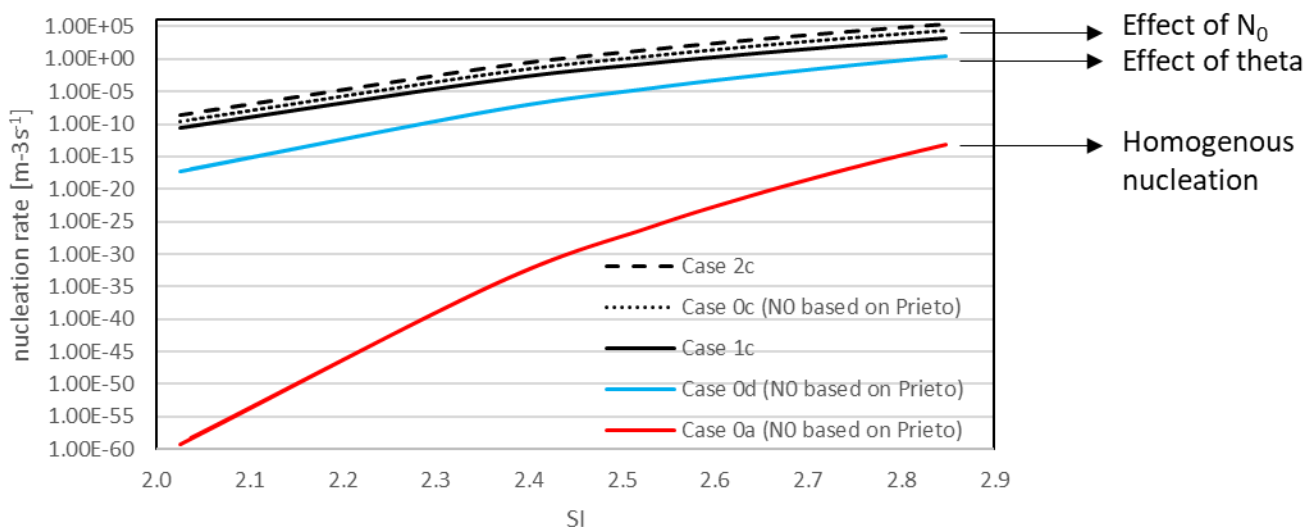

110  
111 **Figure S3** Nucleation rate of barite as function of saturation index (SI) for various combinations  
112 of  $N_0$  and contact angle  $\theta$  (cf. **Table S3**).

113 For the calculation of the nucleation rate and resulting induction time presented in **Figure 6a-b**,  
114 i.e., the pore network experiment, the number of nucleation sites was set to  $2.5 \times 10^{13} \text{ m}^{-3}$  (i.e., the  
115 same value as in Prieto<sup>7</sup>) for the large pores. Since such a value depends on available surface area,  
116 decreasing the pore radius from 20 to 6  $\mu\text{m}$  involves a reduction of the surface area by a factor of  
117 8.5.  $N_0$  for the small pores was thus estimated to decrease by the same factor, i.e.,  $N_0 = 2.9 \times 10^{12}$   
118  $\text{m}^{-3}$  for the small pores. For the 2.5 mM reacting solutions, the initial SI lies between 2.8 and 3.7  
119 resulting in  $N_{\text{Imin}}$  and  $N_{\text{Imax}}$  of  $2.11 \times 10^{13}$  and  $1.5 \times 10^{13}$  monomers per  $\text{m}^3$ , respectively. The  
120 calculated  $J_{\text{min}}$  and  $J_{\text{max}}$  provide a range of nucleation rates for the large and small pores based on  
121 the maximum and minimum concentration of  $\text{BaSO}_4(\text{aq})$  monomers. Nucleation starts on the  
122 surface of PDMS and not on the plasma-treated glass<sup>8</sup> and consequently the contact angle was set  
123 to  $81^\circ$  (based on previous work and within the range expected for PDMS<sup>9</sup>). Using these values,  
124 we calculated the apparent induction time (equation 6 in main document) for the 2.5 mM reacting  
125 solutions ( $2.8 < \text{SI} < 3.7$ ) and compared the results with the corresponding experimental datasets.

126

127 **Supplementary Note 4**

128 **Velocity fields and aqueous solute distributions in the pore network**

129 The velocity fields and the distributions of solutes were simulated using Comsol Multiphysics at  
130 a transient state (i.e., the first 30 minutes of the experiment) and at steady state. The simulation  
131 results for the 100 mM experiment are depicted in **Figure S4a-c**. A concentration gradient builds  
132 up 30 s after the start of the injection of the reactants, with the highest concentrations at the  
133 respective supply channel, which decreases to zero in the opposite channel. The compositions of  
134 the aqueous solutions along L1 and L2 were exported, and the geochemistry (activities of solutes)  
135 was solved using GEMS selector<sup>10</sup> to determine the saturation indices (SI). The saturation indices  
136 (SI) along lines L1 and L2 for the highest and lowest concentrations of solutes used in the  
137 experiments are plotted in **Figure S4d-g**. These graphs show that there is a negligible difference  
138 between the SI calculated for 600 s (10 minutes) after the start of the experiments and the steady  
139 state. Consequently, for any nucleation event after 600 s, the calculated steady-state SI was used  
140 in our analysis. The ranges of SI at steady state for the various experiments are given in **Table S4**.

141  
142 **Table S2** Calculated SI ranges associated with experiments conducted at different concentrations  
143 of reactants.

| Equimolar reacting solutions of Na <sub>2</sub> SO <sub>4</sub> and BaCl <sub>2</sub> [mM] | Range of saturation index (SI) at steady state |
|--------------------------------------------------------------------------------------------|------------------------------------------------|
| 0.325                                                                                      | 1.4 - 2.2                                      |
| 0.5                                                                                        | 1.7 - 2.5                                      |
| 0.75                                                                                       | 2.0 - 2.8                                      |
| 1                                                                                          | 2.2 - 3.1                                      |
| 1.25                                                                                       | 2.4 - 3.2                                      |
| 2.5                                                                                        | 2.8 - 3.7                                      |
| 5                                                                                          | 3.2 - 4.1                                      |
| 10                                                                                         | 3.6 - 4.5                                      |
| 100                                                                                        | 4.7 - 5.6                                      |

145

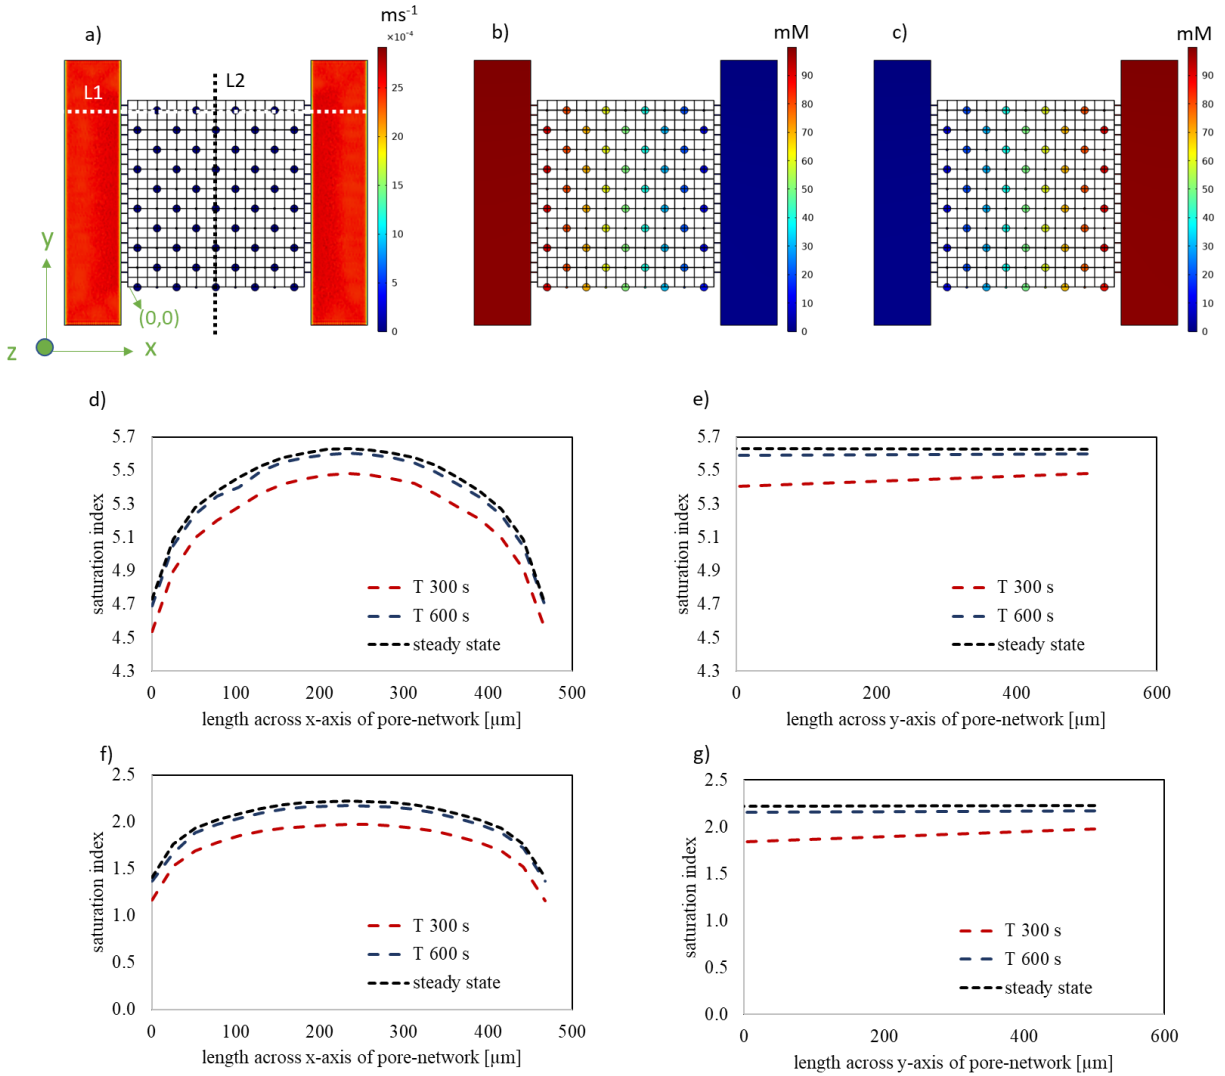

146

147 **Figure S4 a** Velocity field at steady state across plane  $Z=0.5 \mu\text{m}$  with numerical sampling lines  
 148 L1 and L2, **b** and **c** simulated concentrations of  $\text{Ba(aq)}$  and  $\text{SO}_4(\text{aq})$  across the pore network at  
 149 steady state for the 100 mM solutions experiment (highest concentration injected); **d** and **e**  
 150 temporal evolution of the saturation indices along lines L1 and L2, respectively, for the 100 mM  
 151 solution experiment; **f**, and **g** temporal evolution of the saturation indices along lines L1 and L2,  
 152 respectively, for the 0.325 mM solution experiment.

153

154



155 **Supplementary Note 5**

156 **Determination of the volume of droplets**

157 Droplets formed in microfluidic channels can either fill the cross-sectional area where they can be  
 158 assumed to be rectangular cuboids or can be smaller than the channel depth and therefore assumed  
 159 to be spheres. According to the images collected from the droplets in motion, they tend to adopt a  
 160 cylindroid shape with rounded edges. The volume of these droplets can be calculated using the  
 161 following equation given by dos Santos et al.<sup>13</sup>:

162 
$$V = \frac{\pi}{4}hwL - \frac{\pi}{12}wh^2 \quad (S5.1)$$

163 where  $h$  is the depth of the microfluidic channel, and  $w$  and  $L$  are the width and length of the  
 164 cylindroid (**Figure S5**). The dimensions of the droplets and the calculated number of BaSO<sub>4</sub>(aq)  
 165 monomers (for reactant concentrations of 0.75 mM) for the different droplet microfluidic  
 166 experiments are provided in **Table S5**.

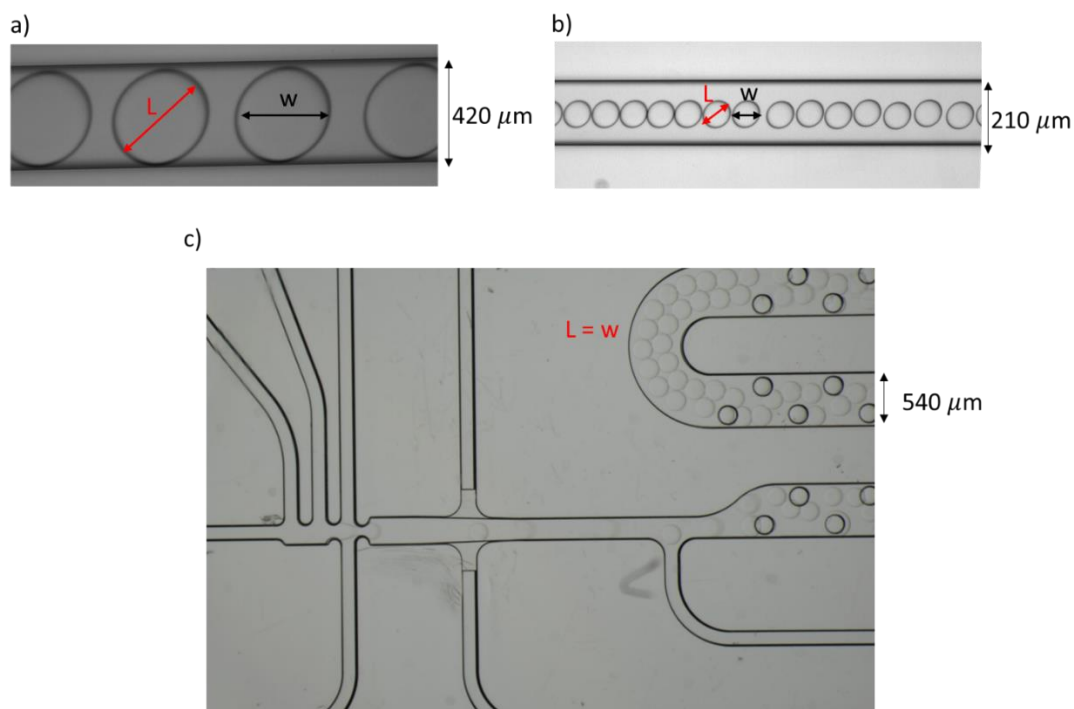

167  
 168 **Figure S5** Illustration of the width and length of cylindroid shaped droplets; **a** for experiment A;  
 169 **b** for experiment B; **c** for experiment C.

170 **Table S3** Summary of size of droplets and calculated number of BaSO<sub>4</sub>(aq) monomers (for  
 171 reactant concentrations of 0.75 mM) for the different droplet microfluidic experiments A-C.

| Design | L<br>[μm] | W<br>[μm] | h<br>[μm] | Volume<br>[nL] | Number of<br>monomers |
|--------|-----------|-----------|-----------|----------------|-----------------------|
| A      | 390       | 360       | 140       | 15             | $5.5 \times 10^8$     |
| B      | 86        | 77        | 70        | 0.3            | $1.1 \times 10^7$     |
| C      | 173       | 173       | 100       | 1.9            | $6.9 \times 10^7$     |

## 172 **Supplementary Note 6**

### 173 **Image processing of droplet experiments**

174 Given the increasing interest in studying nucleation, it is important to establish a robust and  
175 automated image analysis procedure to produce reliable and reproducible results that can be easily  
176 stored, analyzed, and compared with other experimental or simulated results.

### 177 **Python packages**

178 The analysis methodology was developed and implemented in the open-source Python  
179 programming language version 3.9.13<sup>14</sup>, using the OpenCV-Python version 4.0.0.66<sup>15</sup>, numpy  
180 version 1.21.5<sup>16</sup>, and pandas version 1.4.4<sup>17</sup> libraries.

### 181 **Datasets**

182 Two datasets were analyzed: The first dataset comprised 20 images captured over 10 hours, with  
183 the first image taken 30 minutes after starting the experiment (experiment B). The second dataset  
184 comprised a single image taken 30 minutes after the start of experiment A. All the images had a  
185 size of 11934 x 6490 pixels. The original images were converted to 8-bit grayscale.

### 186 **Cropping**

187 For the first dataset, it was noticed that certain regions of the images could not be used because  
188 the storage chips (experiment B) started to crack after long exposure to fluorinated oil. For this  
189 reason, it was decided to crop two different regions from each image to be used for further analysis  
190 covering almost 212 droplets (see **Figure S6a**). To check the validity of this decision, the ratio of  
191 droplets containing crystals ( $N_0$ ) to the total number of droplets ( $N$ ) was compared between the  
192 selected cropped regions and a much bigger portion of the image, covering almost 550 droplets, at  
193  $t=30$  min (see **Figure S6b**). The results were found to be very compatible with the ratio at the  
194 selected cropped regions in **Figure S6a** being  $\frac{N_0}{N} = 0.971$ , and the ratio from the bigger cropped  
195 portion of the image (**Figure S6b**) being  $\frac{N_0}{N} = 0.970$ .

### 196 **Preprocessing**

197 The first step of preprocessing the cropped regions of the images was to treat the white noise,  
198 which, if left untreated, would make it difficult to identify small crystals in the droplets. The image  
199 denoising was performed using a non-local mean denoising algorithm<sup>18</sup>. This method proved to be  
200 effective in treating the white noise in the images as it scans different portions of the image to  
201 search for a pixel that resembles the pixel it wants to denoise. Additionally, to correctly identify  
202 existing droplets and the crystals formed inside them, it is necessary to convert the grayscale  
203 images into binary images. It is important to mention that applying conventional thresholding  
204 techniques, like Otsu's thresholding method, which uses a global thresholding value proved  
205 ineffective when treating the images in this case, due to existing variations in lighting throughout  
206 the analyzed regions in the images. For this reason, an adaptive thresholding technique<sup>19</sup> was  
207 utilized as it can analyze a small set of neighboring pixels at a time and can compute the threshold  
208 value for that specific local region before performing the binarization. Furthermore, two additional

209 morphological operations were performed on the binarized images to ensure that the droplet  
210 perimeters were completely enclosed to allow for accurate analysis of the images. With the use of  
211 a structuring element, a 3x3 kernel in this case, each morphological operation can identify the  
212 region to be examined around each pixel in the image. The dilation and erosion operations were  
213 applied consecutively to connect any parts of the droplet's outer perimeters that might have been  
214 removed by the previous preprocessing steps. These two morphological preprocessing operations  
215 were applied using the OpenCV-Python library<sup>15</sup>.

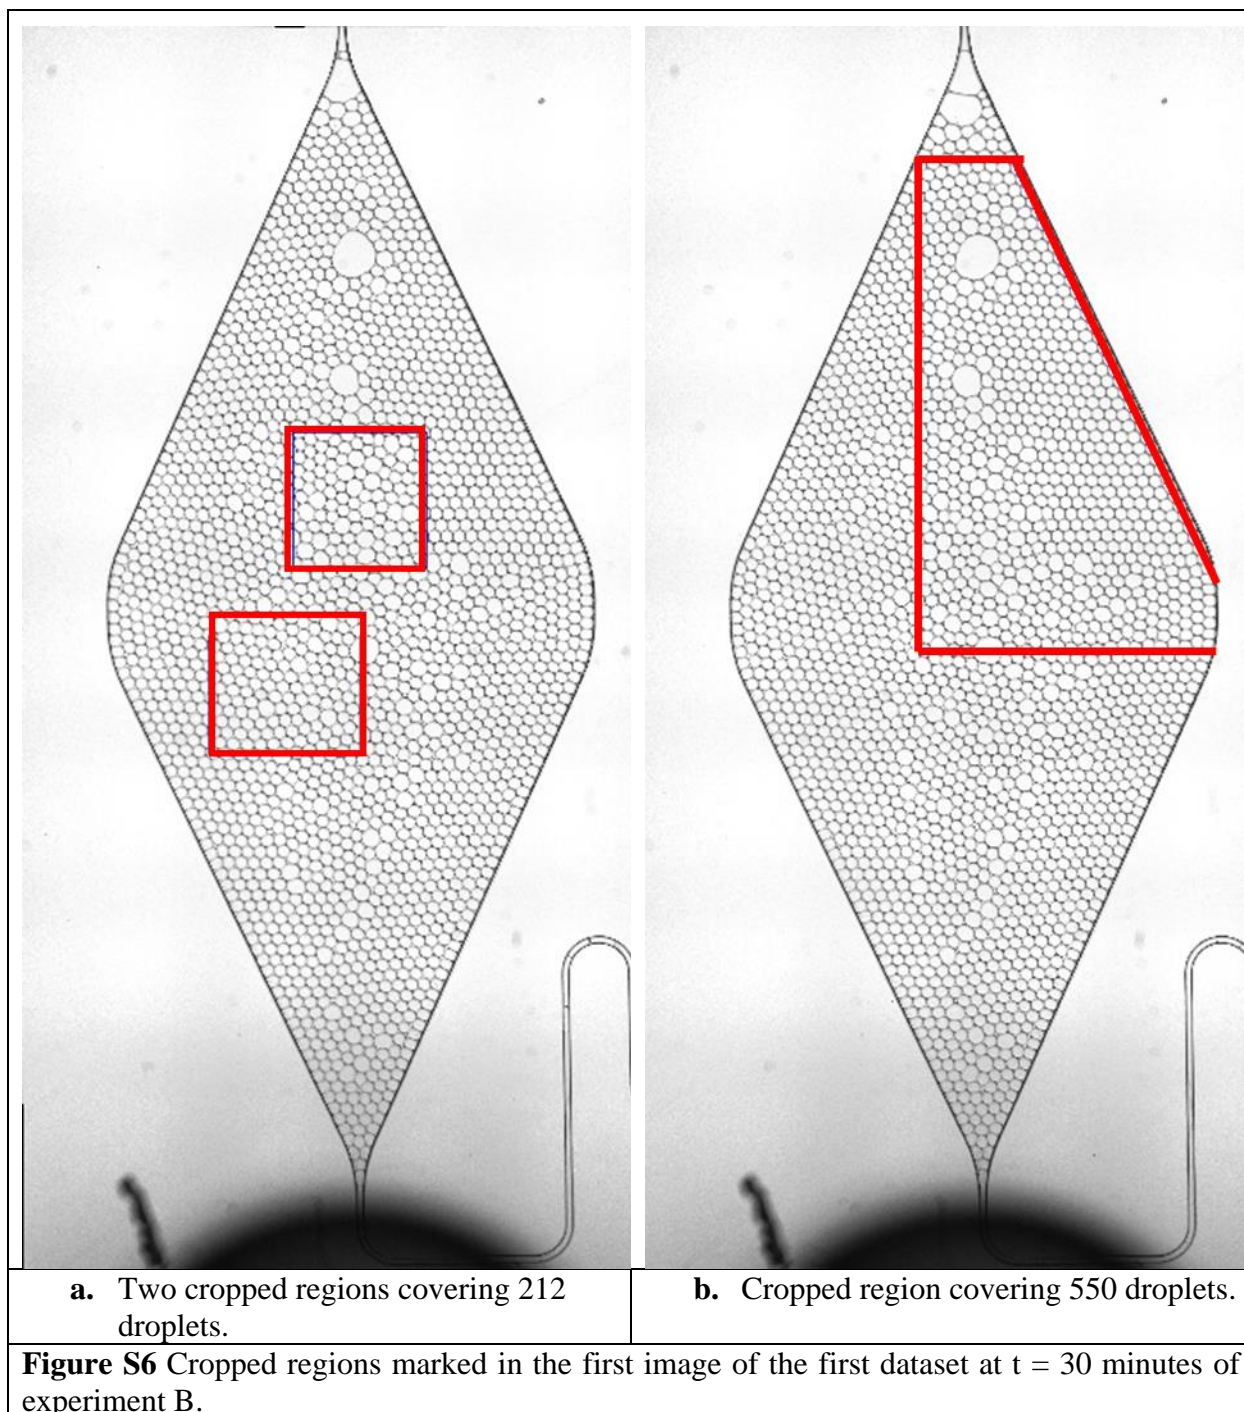

216 **Image analysis**

217 The first step after preprocessing the images was to identify the droplets, which was done by using  
218 the find Contours operation in the OpenCV-Python library<sup>15</sup>. Additional limitations were  
219 introduced to check if the detected contours were of circular shape. Based on the areas of the  
220 identified droplets, it was necessary to statistically identify and remove the droplets that were  
221 outliers. After testing the data using the q-q plot<sup>20</sup> and the Shapiro–Wilk test<sup>21</sup> to check its  
222 normality, it was determined that the data was not normally distributed, the 15<sup>th</sup> and the 95<sup>th</sup>  
223 percentile were determined to be the limits of valid data in our assessment. Afterwards, the  
224 remaining droplets were masked on the binarized image to remove the background to allow for a  
225 better analysis of the formed crystals. Finally, the find Contours operation was used again in the  
226 final image to determine the number of formed crystals. The final analysis for the cropped region  
227 # 1 at t = 30 minutes can be seen in **Figure S5**, where the formed crystals are identified and  
228 numbered.

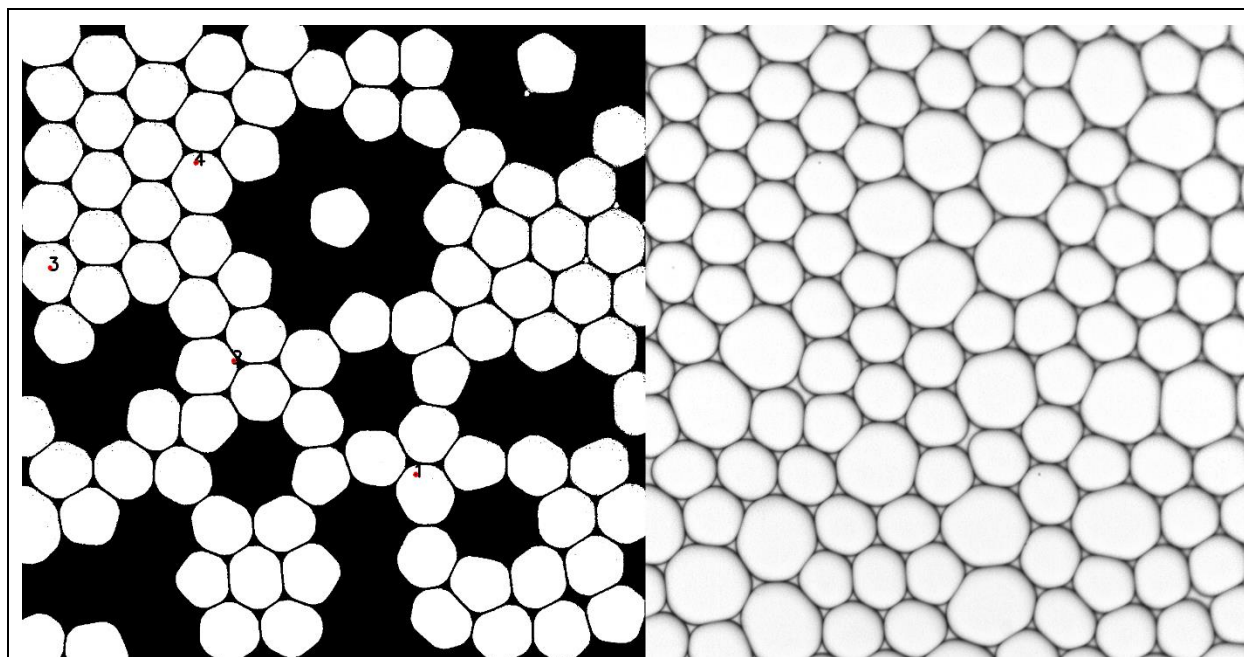

**Figure S7** Final analysis of cropped region # 1 at t = 30 minutes.

229

230

231 **Supplementary References**

- 232 1 Scherer, G. W. Crystallization in pores. *Cement Concr. Res.* **242**, 1347-1358 doi:  
233 [https://doi.org/10.1016/S0008-8846\(99\)00002-2](https://doi.org/10.1016/S0008-8846(99)00002-2) (1999).
- 234 2 Flatt, R. J. Salt damage in porous materials: how high supersaturations are generated. *J.*  
235 *Crys. Growth* **242**, 435-454 doi: [https://doi.org/10.1016/S0022-0248\(02\)01429-X](https://doi.org/10.1016/S0022-0248(02)01429-X) (2002).
- 236 3 Rijniers, L. A., Huinink, H. P., Pel, L. & Kopinga, K. Experimental evidence of  
237 crystallization pressure inside porous media. *Phys. Rev. Letters* **94**, 75503 doi:  
238 <https://doi.org/10.1103/PhysRevLett.94.075503> (2005).
- 239 4 Emmanuel, S. & Berkowitz, B. Effects of pore-size controlled solubility on reactive  
240 transport in heterogeneous rock. *Geophys. Res. Letters* **34**, L06404, doi:  
241 <https://doi.org/10.1029/2006GL028962> (2007).
- 242 5 Nielsen, A. E. Nucleation in aqueous solution. *J. Phys. Chem. Solids* **1**, 419-426 doi:  
243 <https://doi.org/10.1145/1465611.1465667> (1967).
- 244 6 Schindler, P. W. Heterogeneous equilibria involving oxides, hydroxides, carbonates, and  
245 hydroxides carbonates. Equilibrium concepts in natural water systems. *Adv. Chem. Ser.* **67**,  
246 197-221 doi: <https://pubs.acs.org/doi/10.1021/ba-1967-0067.ch009> (1967).
- 247 7 Prieto, M. Nucleation and supersaturation in porous media (revisited). *Mineral. Mag.* **78**,  
248 1437-1447 doi: <https://doi.org/10.1180/minmag.2014.078.6.11> (2014).
- 249 8 Poonosamy, J. *et al.* A microfluidic experiment and pore scale modelling diagnostics for  
250 assessing mineral precipitation and dissolution in confined spaces. *Chem. Geol.* **528**,  
251 119264 doi: <https://doi.org/10.1016/j.chemgeo.2019.07.039> (2019).
- 252 9 Dirany, M. *et al.* Chemical modification of PDMS surface without impacting the  
253 viscoelasticity: Model systems for a better understanding of elastomer/elastomer adhesion  
254 and friction. *Colloids Surf. A* **468**, 174-183 doi:  
255 <https://doi.org/10.1016/j.colsurfa.2014.12.036> (2015).
- 256 10 Kulik, D. A. *et al.* GEM-Selektor geochemical modeling package: Revised algorithm and  
257 GEMS3K numerical kernel for coupled simulation codes. *Comput. Geosci.* **17**, 1-24, doi:  
258 <https://link.springer.com/article/10.1007/s10596-012-9310-6> (2013).
- 259 11 Poonosamy, J. *et al.* Barite precipitation following celestite dissolution in a porous  
260 medium: a SEM/BSE and micro XRF/XRD study. *Geochim. Cosmochim. Acta.* **182**, 131-  
261 144 doi: <https://doi.org/10.1016/j.gca.2016.03.011> (2016).
- 262 12 Poonosamy, J. *et al.* A lab-on-a-chip approach integrating in-situ characterization and  
263 reactive transport modelling diagnostics to unravel (Ba,Sr)SO<sub>4</sub> oscillatory zoning. *Sci. Rep.*  
264 **11**, 23678 doi: <https://www.nature.com/articles/s41598-021-02840-9> (2021).
- 265 13 Dos Santos, E. C., Ladosz, A., Maggioni, G. M., von Rohr, P. R. & Mazzotti, M.  
266 Characterization of shapes and volumes of droplets generated in PDMS T-junctions to  
267 study nucleation. *Chem. Eng. Res. Des.* **138**, 444-457 doi:  
268 <https://doi.org/10.1016/j.cherd.2018.09.001> (2018).
- 269 14 Van Rossum, Drake Jr, F. L. Python tutorial (Vol. 620). Amsterdam, The Netherlands:  
270 Centrum voor Wiskunde en Informatica (1995).
- 271 15 Bradski, G. The OpenCV Library. *Dr. Dobb's Journal of Software Tools for the*  
272 *Professional Programmer* 25, no. 11 (2000).

273 16 Harris, C. R. *et al.* Array programming with NumPy. *Nature* **585**, 357-362  
274 doi:<https://www.nature.com/articles/s41586-020-2649-2> (2020).  
275 17 McKinney, W. Data structures for statistical computing in python. *Proc. of the 9th Python*  
276 *in Science Conf.*, 51-56 (2010).  
277 18 Buades, A., Coll, B. & Morel, J. M. Non-local means denoising. *Image Processing On Line*  
278 **1**, 208-212 doi; [https://www.ipol.im/pub/art/2011/bcm\\_nlm/?utm\\_source=doi](https://www.ipol.im/pub/art/2011/bcm_nlm/?utm_source=doi) (2011).  
279 19 Gonzalez, R. C. Digital image processing. Pearson education India (2009).  
280 20 Kaltenbach, H.-M. A concise guide to statistics. Springer, Berlin, Heidelberg (2012).  
281 21 Shapiro, S. S. & Wilk, M. B. An analysis of variance test for normality (complete samples).  
282 *Biometrika* **52**, 591-611 doi:<https://doi.org/10.2307/2333709> (1965).  
283
